# Supplementary material for: Modular within and between score for drug response prediction in cancer cell lines
Source: Royal Society of Chemistry journal article supplement (doi:10.1039/c9mo00162j), 2019-11-25
Supplement: c9mo00162j3.xlsx [file c9mo00162j3.xlsx]

## Sheet: Sheet1
Cell line	Cell type	Drug	Drug Usage	Rank by MSDRP	Literature evidences and detailed descriptions	Rank by WBSMDA	Rank by Zhang's method
D-245MG	glioma	Cetuximab	GBM	1	Combination of cetuximab with bevacizumab and irinotecan is well tolerated in recurrent GBM, which is the most mortal form of glioma (Hasselbalch, et al., 2010).	16	59
		rTRAIL	GBM	6	GBM exhibits a range of sensitivity in rTRAIL (Panner, et al., 2005).	48	67
		Lapatinib	GBM	9	A mathematical model acquires optimum lapatinib dosing schemes as the therapeutic strategy of GBM (Stein, et al., 2018).	22	220
		Gefitinib	GBM	10	Gefitinib is added into radiation therapy and is well tolerated for newly diagnosed GBM patients (Chakravarti, et al., 2013).	125	96
		Erlotinib	GBM	13	During and following radiotherapy, patients with newly diagnosed GBM exhibit better survival than historical controls because of taking erlotinib plus temozolomide (Prados, et al., 2009).	98	238
		Trametinib	Glioma	15	There are two patients with BRAFV600E mutated glioma treated successfully by combination of dabrafenib with trametinib (Brown, et al., 2017).	18	50
		Amuvatinib	GBM	18	Amuvatinib (MP470) radiosensitizes several GBM cell lines both in vitro and in vivo, and may help to improve outcomes for patients with GBM (Welsh, et al., 2009).	19	82
		TGX221	Glioblastoma	20	TGX-221 can inhibit proliferation and induce apoptosis in glioblastoma cells (Yang, et al., 2017).	161	225
SNU-283	large_intestine	Cetuximab	CRC	1	First-line treatment with cetuximab plus FOLFIRI, as compared with FOLFIRI alone, reduce the risk of progression of metastatic CRC (Van Cutsem, et al., 2009).	16	176
		Afatinib	CRAC	2	Afatinib has efficacy in patients with KRAS wild-type metastatic CRAC and has a manageable safety profile (Hickish, et al., 2014).	46	159
		FH535	CRC	3	FH535 inhibits proliferation and migration of CRC cells by regulating CyclinA2 and Claudin1 gene expression (Tu, et al., 2019).	62	8
		XAV939	CC	8	The WNT signaling pathway inhibitor XAV939 is able to significantly increase the apoptosis induced by 5-FU/DDP in CC cells (Wu, et al., 2016).	50	77
		Gefitinib	CRC	9	Phospho-EGFR levels determine the sensitivity of CRC cells to gefitinib alone (Van Schaeybroeck, et al., 2005).	125	173
		Lapatinib	CRC	12	The combination of trastuzumab and lapatinib is active and well tolerated in treatment-refractory patients with HER2-positive metastatic CRC (Sartore-Bianchi, et al., 2016).	22	241
		Trametinib	CRC	13	The combination of dabrafenib + trametinib has activity in a subset of BRAF V600 mutant CRC patients (Corcoran, et al., 2014).	18	128
NCI-H660	prostate	Cetuximab	CRPC	1	The epidermal growth factor receptor inhibition with cetuximab may produce an improvement on the therapeutic efficacy of patients with metastatic CRPC (Cathomas, et al., 2012).	16	190
		Afatinib	CRPC	3	Nintedanib and/or afatinib demonstrate anti-tumor activity in unselected advanced CRPC patients (Molife, et al., 2014).	46	176
		Bicalutamide	PC	4	Adding bicalutamide 150 mg to standard care provides significant clinical benefits in patients with locally advanced PC (McLeod, et al., 2006).	14	128
		XAV939	PC	8	The use of the Wnt/β-catenin signaling inhibitor XAV939 in both PC cells and patients’ lymphocytes is shown to potentiate the elimination of PC cells in vitro (Stakheev, et al., 2019).	50	92
		SB216763	PC	12	Research suggested a potential new therapeutic application for GSK-3 inhibitors SB216763 in PC (Mazor, et al., 2004).	85	200
		EHT-1864	PC	13	Rac1 inhibitor EHT-1864 renders PC cells sensitive to bevacizumab (Goel, et al., 2016).	142	46
		Lapatinib	CRPC	15	Lapatinib showes single agent activity in a small subset of unselected patients with CRPC (Whang, et al., 2013).	22	245
U-CH2	bone_other	FH535	Osteosarcoma	2	FH535 has ability to control osteosarcoma (Gustafson, et al., 2017).	62	32
		rTRAIL	Osteosarcoma	6	Treatment for osteosarcoma by combining sulforaphane with rTRAIL may be promising and warranted (Matsui, et al., 2006).	48	67
		Lapatinib	Osteosarcoma	9	Lapatinib may be safe and effective in treating osteosarcoma through altering the malignant phenotype of osteosarcoma cells (Long, et al., 2014).	22	220
MHH-CALL-4	B_cell_leukemia	Navitoclax	B-Cell CLL	2	Navitoclax in combination with RTX is generally well-tolerated as initial therapy for B-Cell CLL patients and demonstrate greater clinical activity than treatment with RTX alone (Eradat, et al., 2012).	126	191
KO52	acute_myeloid_leukaemia	Sepantronium bromide	AML	5	Existing study regards YM155 (Sepantronium Bromide)-mediated inhibition of Survivin as an useful therapeutic strategy for AML (Smith, et al., 2015).	10	31
		Lapatinib	AML	9	Lapatinib induces autophagic cell death and differentiation in AML, which imply that lapatinib may be potentially beneficial in treating AML (Chen, et al., 2016).	22	220
		Gefitinib	AML	10	Gefitinib can induce myeloid differentiation of AML and it is warranted to implement clinical trials of gefitinib in patients with AML (Stegmaier, et al., 2005).	125	96
		Erlotinib	AML	13	Erlotinib may produce a particularly efficient effect in antagonizing AML (Lainey, et al., 2012).	98	238
SC-1	B_cell_lymphoma	Sepantronium bromide	DLBCL	5	Combination of sepantronium bromide (YM155) with a STAT3 inhibitor is a new strategy to treat DLBCL (Kaneko, et al., 2013).	10	31
RERF-LC-FM	lung_small_cell_carcinoma	XAV939	SCLC	8	The present study demonstrated the apoptosis in SCLC cell lines induced by XAV939, which was an efficient approach to prevent or cure SCLC (Guo, et al., 2017).	50	11
		Gefitinib	SCLC	10	The treatment with gefitinib is a novel option for a subset of patients with SCLC (Araki, et al., 2005).	125	96
		Amuvatinib	SCLC	18	The research suggested the potential of amuvatinib in SCLC patients with high c-Kit expression (Byers, et al., 2017).	19	82
NCI-H740	lung_small_cell_carcinoma	XAV939	SCLC	9	The present study demonstrated the apoptosis in SCLC cell lines induced by XAV939, which was an efficient approach to prevent or cure SCLC (Guo, et al., 2017).	50	94
		PD173074	SCLC	11	FGFR inhibitor PD173074 improves response to classic therapeutic regimen and can be efficient as a monotherapy for a subset of SCLC patients (Pardo, et al., 2009).	15	174
		Amuvatinib	SCLC	12	The research suggested the potential of amuvatinib in SCLC patients with high c-Kit expression (Byers, et al., 2017).	19	156
		Veliparib	SCLC	18	Veliparib potentiates standard cytotoxic agents against SCLC in a cell-specific manner (Owonikoko, et al., 2014).	23	178
		Elesclomol	SCLC	20	Drugs classifies as ‘effective’ for most SCLC cells include elesclomol (Wildey, et al., 2014).	45	34
NCCIT	testis	Olaparib	TGCT	12	TGCT is sensitive to olaparib monotherapy and combination with cisplatin would decrease the survival of TGCT cell lines (Cavallo, et al., 2011).	43	76
BONNA-12	hairy_cell_leukaemia	JQ1	HCL	19	JQ1 inhibits HCL or its variants (Arons, et al., 2016).	59	200
References
Brown, N.F., et al. (2017) Dabrafenib and trametinib in BRAFV600E mutated glioma, CNS oncology, 6, 291-296.
Cathomas, R., et al. (2012) Efficacy of cetuximab in metastatic castration-resistant prostate cancer might depend on EGFR and PTEN expression: results from a phase II trial (SAKK 08/07), Clinical cancer research, 18, 6049-6057.
Cavallo, F., et al. (2011) Abstract C51: High sensitivity of testicular germ cell tumors to PARP inhibitor olaparib alone and in combination with cisplatin. AACR.
Chakravarti, A., et al. (2013) RTOG 0211: a phase 1/2 study of radiation therapy with concurrent gefitinib for newly diagnosed glioblastoma patients, International Journal of Radiation Oncology* Biology* Physics, 85, 1206-1211.
Chen, Y.-J., et al. (2016) Lapatinib induces autophagic cell death and differentiation in acute myeloblastic leukemia, OncoTargets and therapy, 9, 4453.
Guo, W., et al. (2017) Wnt inhibitor XAV939 suppresses the viability of small cell lung cancer NCI‑H446 cells and induces apoptosis, Oncology letters, 14, 6585-6591.
Gustafson, C.T., et al. (2017) FH535 suppresses osteosarcoma growth in vitro and inhibits Wnt signaling through tankyrases, Frontiers in pharmacology, 8, 285.
Hasselbalch, B., et al. (2010) Cetuximab, bevacizumab, and irinotecan for patients with primary glioblastoma and progression after radiation therapy and temozolomide: a phase II trial, Neuro-Oncology, 12, 508-516.
Lainey, E., et al. (2012) Erlotinib antagonizes ABC transporters in acute myeloid leukemia, Cell Cycle, 11, 4079-4092.
Long, X.-H., et al. (2014) Lapatinib alters the malignant phenotype of osteosarcoma cells via downregulation of the activity of the HER2-PI3K/AKT-FASN axis in vitro, Oncology reports, 31, 328-334.
Matsui, T.-a., et al. (2006) Sulforaphane enhances TRAIL-induced apoptosis through the induction of DR5 expression in human osteosarcoma cells, Carcinogenesis, 27, 1768-1777.
Panner, A., et al. (2005) mTOR controls FLIPS translation and TRAIL sensitivity in glioblastoma multiforme cells, Molecular and cellular biology, 25, 8809-8823.
Prados, M.D., et al. (2009) Phase II study of erlotinib plus temozolomide during and after radiation therapy in patients with newly diagnosed glioblastoma multiforme or gliosarcoma, Journal of Clinical Oncology, 27, 579.
Smith, A.M., et al. (2015) Targeting survivin with YM155 (Sepantronium Bromide): a novel therapeutic strategy for paediatric acute myeloid leukaemia, Leukemia research, 39, 435-444.
Stegmaier, K., et al. (2005) Gefitinib induces myeloid differentiation of acute myeloid leukemia, Blood, 106, 2841-2848.
Stein, S., et al. (2018) Mathematical modeling identifies optimum lapatinib dosing schedules for the treatment of glioblastoma patients, Plos Comput Biol, 14, e1005924.
Pardo, O.E., et al. (2009) The fibroblast growth factor receptor inhibitor PD173074 blocks small cell lung cancer growth in vitro and in vivo, Cancer research, 69, 8645-8651.
Byers, L.A., et al. (2017) A phase 2, open-label, multi-center study of amuvatinib in combination with platinum etoposide chemotherapy in platinum-refractory small cell lung cancer patients, Oncotarget, 8, 81441.
Owonikoko, T.K., et al. (2014) Poly (ADP) ribose polymerase enzyme inhibitor, veliparib, potentiates chemotherapy and radiation in vitro and in vivo in small cell lung cancer, Cancer medicine, 3, 1579-1594.
Wildey, G., et al. (2014) Pharmacogenomic approach to identify drug sensitivity in small-cell lung cancer, PloS one, 9, e106784.
Arons, E., et al. (2016) Increased Expression of Myc in Hairy Cell Leukemia, and Cell-Sensitivity to JQ1. Am Soc Hematology.
Kaneko, N., et al. (2013) Combination of YM155, a survivin suppressant with a STAT3 inhibitor: a new strategy to treat diffuse large B-cell lymphoma, Leukemia research, 37, 1156-1161.
Araki, J., et al. (2005) Efficacy of the tyrosine kinase inhibitor gefitinib in a patient with metastatic small cell lung cancer, Lung cancer, 48, 141-144.
Welsh, J.W., et al. (2009) The c-Met receptor tyrosine kinase inhibitor MP470 radiosensitizes glioblastoma cells, Radiation oncology, 4, 69.
Yang, X., et al. (2017) TGX-221 inhibits proliferation and induces apoptosis in human glioblastoma cells, Oncology reports, 38, 2836-2842.
Eradat, H., et al. (2012) Preliminary results of a phase II open-label, randomized study of the BH3 mimetic protein navitoclax (ABT-263) with or without rituximab for treatment of previously untreated B-cell chronic lymphocytic leukemia. Am Soc Hematology.
Molife, L.R., et al. (2014) Randomized Phase II trial of nintedanib, afatinib and sequential combination in castration-resistant prostate cancer, Future oncology, 10, 219-231.
McLeod, D.G., et al. (2006) Bicalutamide 150 mg plus standard care vs standard care alone for early prostate cancer, BJU international, 97, 247-254.
Stakheev, D., et al. (2019) The WNT/β-catenin signaling inhibitor XAV939 enhances the elimination of LNCaP and PC-3 prostate cancer cells by prostate cancer patient lymphocytes in vitro, Scientific reports, 9, 4761.
Mazor, M., et al. (2004) Inhibition of glycogen synthase kinase-3 represses androgen receptor activity and prostate cancer cell growth, Oncogene, 23, 7882.
Goel, H.L., et al. (2016) P-Rex1 promotes resistance to VEGF/VEGFR-targeted therapy in prostate cancer, Cell reports, 14, 2193-2208.
Whang, Y.E., et al. (2013) A phase II study of lapatinib, a dual EGFR and HER-2 tyrosine kinase inhibitor, in patients with castration-resistant prostate cancer. Urologic Oncology: Seminars and Original Investigations. Elsevier, pp. 82-86.
Van Cutsem, E., et al. (2009) Cetuximab and chemotherapy as initial treatment for metastatic colorectal cancer, New England Journal of Medicine, 360, 1408-1417.
Hickish, T., et al. (2014) A randomised, open-label phase II trial of afatinib versus cetuximab in patients with metastatic colorectal cancer, European Journal of Cancer, 50, 3136-3144.
Tu, X., et al. (2019) FH535 inhibits proliferation and migration of colorectal cancer cells by regulating CyclinA2 and Claudin1 gene expression, Gene, 690, 48-56.
Wu, X., et al. (2016) Tankyrase 1 inhibitior XAV939 increases chemosensitivity in colon cancer cell lines via inhibition of the Wnt signaling pathway, International journal of oncology, 48, 1333-1340.
Van Schaeybroeck, S., et al. (2005) Epidermal growth factor receptor activity determines response of colorectal cancer cells to gefitinib alone and in combination with chemotherapy, Clinical Cancer Research, 11, 7480-7489.
Sartore-Bianchi, A., et al. (2016) Dual-targeted therapy with trastuzumab and lapatinib in treatment-refractory, KRAS codon 12/13 wild-type, HER2-positive metastatic colorectal cancer (HERACLES): a proof-of-concept, multicentre, open-label, phase 2 trial, The Lancet Oncology, 17, 738-746.
Corcoran, R.B., et al. (2014) Phase 1-2 trial of the BRAF inhibitor dabrafenib (D) plus MEK inhibitor trametinib (T) in BRAF V600 mutant colorectal cancer (CRC): Updated efficacy and biomarker analysis. American Society of Clinical Oncology.
