# Supplementary figures and images for: Modular within and between score for drug response prediction in cancer cell lines
Source: Royal Society of Chemistry journal article supplement (doi:10.1039/c9mo00162j), 2019-11-25

a)

AUROC values of other tissue types

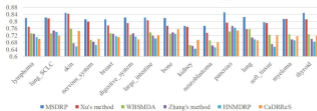

b)

AUPR values of other tissue types

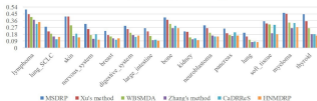

Supplement: c9mo00162j1.pdf [file c9mo00162j1.pdf]
